# Supplementary material
Source: MDPI journal article supplement (https://www.mdpi.com/2073-4433/14/5/782)
Supplement: s1 [file s1]

## Supplementary Materials:

# Main Emission Sources and Health Risks of Polycyclic Aromatic Hydrocarbons and Nitro-Polycyclic Aromatic Hydrocarbons at Three Typical Sites in Hanoi

Hao Zhang <sup>1</sup>, Chau-Thuy Pham <sup>2,\*</sup>, Bin Chen <sup>3,4,5,\*</sup>, Xuan Zhang <sup>1</sup>, Yan Wang <sup>1</sup>, Pengchu Bai <sup>1</sup>, Lulu Zhang <sup>6,7</sup>, Seiya Nagao <sup>7</sup>, Akira Toriba <sup>8</sup>, Trung-Dung Nghiem <sup>9</sup> and Ning Tang <sup>7,10</sup>

<sup>1</sup> Graduate School of Medical Sciences, Kanazawa University, Kakuma-machi, Kanazawa 920-1192, Japan

<sup>2</sup> University of Engineering and Technology, Vietnam National University, Hanoi, 144 Xuan Thuy, Cau Giay, Hanoi 131001, Vietnam

<sup>3</sup> Collaborative Innovation Center on Forecast and Evaluation of Meteorological Disasters, Nanjing University of Information Science and Technology, Nanjing 210044, China

<sup>4</sup> Key Laboratory of Cloud-Precipitation Physics and Severe Storms, Institute of Atmospheric Physics, Chinese Academy of Sciences, Beijing 100029, China

<sup>5</sup> Institute of Carbon Neutrality, Qilu Zhongke, Jinan 250100, China

<sup>6</sup> School of Civil Engineering, Architecture and Environment, Hubei University of Technology, Wuhan 430068, China

<sup>7</sup> Institute of Nature and Environmental Technology, Kanazawa University, Kakuma-machi, Kanazawa 920-1192, Japan

<sup>8</sup> Graduate School of Biomedical Sciences, Nagasaki University, 1-14 Bunkyo-machi, Nagasaki 852-8521, Japan

<sup>9</sup> School of Environmental Science and Technology, Hanoi University of Science and Technology, No 1 Dai Co Viet, Hanoi 112400, Vietnam

<sup>10</sup> Institute of Medical, Pharmaceutical and Health Sciences, Kanazawa University, Kakuma-machi, Kanazawa 920-1192, Japan

\* Correspondence: thuypham@vnu.edu.vn (C.T.P.); chen\_bin@mail.iap.ac.cn (B.C.)

**Table S1.** Pretreatment and instrumental analysis of PAHs and NPAHs.

To analyze the PAHs and NPAHs, each filter was cut into small pieces and placed in flasks. Internal standards (pyrene-*d*<sub>10</sub> (Pyr-*d*<sub>10</sub>), benzo[*a*]pyrene-*d*<sub>12</sub> (BaP-*d*<sub>12</sub>)) were added to the filter. Then, dichloromethane was added to each flask for extracting. After ultrasonic extraction twice (once for 15 min at room temperature), the solution was then filtered through filter paper (Advantec, Toyo No. 6, Toyo Roshi Kaisha, Ltd., Tokyo, Japan) into a conical flask. The solution was concentrated with a rotary evaporator after adding dimethyl sulfoxide (100 µL). Then, ethanol was added to make the residue up to 1 mL. Finally, the solution was filtered through a 0.45 µm membrane filter (HLC-DISK13, Kanto Chemical CO., Inc., Tokyo, Japan) into an injection vial. A high-performance liquid chromatography (HPLC) system (Shimadzu Inc., Kyoto, Japan) with a fluorescence detector (RF-20Axs, Shimadzu Inc., Kyoto, Japan) was used to analyze ten PAHs and six NPAHs. The analyte first through a reducer column (NPPak-RS, 4.0 i.d. × 10 mm, JASCO Co., Tokyo, Japan) with acetate (pH 5.5)/ethanol (95%) buffer and ascorbic acid to reduce NPAHs to their amino PAHs. Two reversed-phase column (Inertsil ODS-P, 4.6 i.d. × 250 mm, GL Sci., Inc., Tokyo, Japan) were used as the analytical columns. A mixture of imidazole buffer (pH 7.6) and acetonitrile was used as the mobile phase with a flow rate of 1.0 mL min<sup>-1</sup> under a gradient concentration. For fluorescence detection, a two-detection channel on a single run was performed. The time program for the fluorescence detector was set at the optimum excitation (Ex) and emission (Em) wavelengths for PAHs as follows: ch1: 0 – 45.0 min, Ex/Em = 513/283 nm (2-NFR); 45.0 – 51.0 min, Ex/Em = 437/273 nm (2-NP and 6-NC); 51.0 – 60.0 min, Ex/Em = 513/283 nm (6-NBaP); 60.0 – 80.0 min, Ex/Em = 378/288 nm (BeP); 80.0 – 100 min, Ex/Em = 482/294 nm (IDP); ch2: 0 – 46.0 min, Ex/Em = 430/360 nm (1-

NP); 46.0 – 50.0 min, Ex/Em = 475/300 nm (7-NBaA); 50.0 – 54.0 min, Ex/Em = 433/280 nm (FR); 54.0 – 56.0 min, Ex/Em = 392/331 nm (Pyr-*d*<sub>10</sub> and Pyr); 56.0 – 58.8 min, Ex/Em = 407/267 nm (BaA); 58.8 – 61.0 min, Ex/Em = 381/265 nm (Chr); 61.0 – 66.0 min, Ex/Em = 420/295 nm (BbF, BkF); 66.0 – 100 min, Ex/Em = 407/267 nm (BaP-*d*<sub>12</sub>, BaP and BgPe).

**Table S1.** The toxic equivalent factor (TEF) of PAHs and NPAHs.

| PAHs and NPAHs | TEF   | Reference |
|----------------|-------|-----------|
| FR             | 0.001 | [1]       |
| Pyr            | 0.001 | [1]       |
| BaA            | 0.1   | [2]       |
| Chr            | 0.01  | [2]       |
| BbF            | 0.1   | [2]       |
| BkF            | 0.1   | [2]       |
| BaP            | 1     | [2]       |
| BeP            | 0.002 | [2]       |
| BgPe           | 0.01  | [1]       |
| IDP            | 0.1   | [2]       |
| 2-NFR          | 0.01  | [1]       |
| 1-NP           | 0.1   | [1]       |
| 6-NC           | 10    | [1]       |

**Table S2.** Parameters of incremental lifetime cancer risks (ILCRs).

| Exposure parameters                  | Unit                 | Male                   | Female                 | Reference |
|--------------------------------------|----------------------|------------------------|------------------------|-----------|
| Body weight (BW)                     | Kg                   | 61.2                   | 54.0                   | [3]       |
| Ingestion rate (IR <sub>ing</sub> )  | mg/day               | 100                    | 100                    |           |
| Exposure frequency (EF)              | day <sup>-1</sup>    | 365                    | 365                    |           |
| surface factor (SL)                  | mg/cm <sup>2</sup>   | 0.07                   | 0.07                   | [4]       |
| absorption factor (ABS)              | day <sup>-1</sup>    | 0.13                   | 0.13                   |           |
| Inhalation rate (IR <sub>inh</sub> ) | m <sup>3</sup> /day  | 19.3                   | 16.2                   |           |
| Surface area (SA)                    | cm <sup>2</sup> /day | 5,700                  | 5,700                  |           |
| Exposure duration (ED)               | years                | 65                     | 65                     |           |
| Average life span (AT)               | days                 | 25550                  | 25550                  | [5]       |
| Particle emission factor (PEF)       | m <sup>3</sup> /kg   | 1.36 × 10 <sup>9</sup> | 1.36 × 10 <sup>9</sup> |           |
| Lifetime (LT)                        | years                | 75                     | 80                     | [6]       |
| Absorption factor (AF)               | mg/cm <sup>2</sup>   | 0.07                   | 0.07                   | [7]       |

**Table S3.** Average PAHs concentration (ng/m<sup>3</sup>) at three sites in Hanoi during the sampling periods.

| Winter | GL (2019)   | XT (2021)   | DA (2021)   |
|--------|-------------|-------------|-------------|
| FR     | 0.79 ± 0.67 | 0.25 ± 0.12 | 2.11 ± 1.42 |
| Pyr    | 0.70 ± 0.54 | 0.22 ± 0.13 | 2.37 ± 1.66 |
| BaA    | 0.48 ± 0.50 | 0.11 ± 0.09 | 1.64 ± 1.20 |
| Chr    | 1.28 ± 1.00 | 0.26 ± 0.16 | 2.89 ± 1.85 |
| BbF    | 1.74 ± 1.36 | 0.43 ± 0.31 | 2.00 ± 1.00 |
| BkF    | 0.79 ± 0.68 | 0.16 ± 0.12 | 1.06 ± 0.55 |
| BaP    | 1.15 ± 1.15 | 0.25 ± 0.21 | 2.30 ± 1.36 |
| BeP    | 1.23 ± 0.92 | 0.30 ± 0.22 | 2.63 ± 1.60 |
| BgPe   | 2.18 ± 1.71 | 0.62 ± 0.43 | 3.06 ± 1.40 |
| IDP    | 1.78 ± 1.48 | 0.35 ± 0.26 | 1.98 ± 0.97 |

|        |             |             |             |
|--------|-------------|-------------|-------------|
| PAH    | 12.1 ± 9.45 | 2.95 ± 2.04 | 22.1 ± 12.7 |
| Summer | GL (2020)   | XT (2022)   | DA (2022)   |
| FR     | 0.08 ± 0.04 | 0.11 ± 0.03 | 0.12 ± 0.04 |
| Pyr    | 0.09 ± 0.04 | 0.13 ± 0.04 | 0.15 ± 0.05 |
| BaA    | 0.07 ± 0.06 | 0.07 ± 0.03 | 0.12 ± 0.04 |
| Chr    | 0.17 ± 0.13 | 0.18 ± 0.07 | 0.24 ± 0.08 |
| BbF    | 0.23 ± 0.18 | 0.31 ± 0.13 | 0.52 ± 0.16 |
| BkF    | 0.12 ± 0.08 | 0.12 ± 0.06 | 0.23 ± 0.06 |
| BaP    | 0.18 ± 0.15 | 0.18 ± 0.08 | 0.39 ± 0.11 |
| BeP    | 0.24 ± 0.15 | 0.25 ± 0.12 | 0.54 ± 0.13 |
| BgPe   | 0.64 ± 0.34 | 0.75 ± 0.31 | 1.24 ± 0.28 |
| IDP    | 0.38 ± 0.22 | 0.45 ± 0.18 | 0.82 ± 0.18 |
| PAH    | 2.20 ± 1.32 | 2.55 ± 1.01 | 4.38 ± 1.07 |

**Table S4.** Average NPAHs concentration (pg/m<sup>3</sup>) at GL, DA and XT in Hanoi during the sampling periods.

| Winter      | GL (2019)   | XT (2021)         | DA (2021)   |
|-------------|-------------|-------------------|-------------|
| 2-NFR       | 278 ± 279   | 32.3 ± 28.1       | 157 ± 75.7  |
| 2-NP        | 79.8 ± 126  | 5.47 ± 6.66       | 60.6 ± 30.5 |
| 1-NP        | 10.2 ± 10.9 | N.D. <sup>a</sup> | 24.5 ± 19.9 |
| 6-NC        | 5.93 ± 4.56 | N.D.              | 83.3 ± 88.3 |
| 7-NBaA      | 94.7 ± 70.1 | 11.5 ± 14.0       | 209 ± 282   |
| 6-NBaP      | 25.4 ± 32.2 | N.D.              | 13.3 ± 19.5 |
| Total NPAHs | 494 ± 464   | 58.0 ± 43.4       | 548 ± 470   |
| Summer      | GL (2020)   | XT (2022)         | DA (2022)   |
| 2-NFR       | 28.0 ± 16.1 | 57.2 ± 29.8       | 56.8 ± 16.4 |
| 2-NP        | 4.76 ± 5.86 | 13.9 ± 18.0       | 15.9 ± 5.43 |
| 1-NP        | 1.76 ± 2.07 | 5.51 ± 4.98       | 1.70 ± 1.68 |
| 6-NC        | 2.64 ± 2.66 | 2.98 ± 4.65       | 11.5 ± 3.17 |
| 7-NBaA      | 14.7 ± 12.0 | 29.3 ± 34.2       | 40.1 ± 26.1 |
| 6-NBaP      | 1.48 ± 2.79 | 6.10 ± 5.55       | 10.8 ± 2.36 |
| Total NPAHs | 55.3 ± 33.5 | 115 ± 75.6        | 137 ± 47.0  |

<sup>a</sup> N.D.: Not Detected

**Table S5.** The toxic equivalent concentration range (pg/m<sup>3</sup>) of PAHs and NPAHs (except 2-NP, 7-NBaA and 6-NBaP).

| Winter     | GL (2019)   | XT (2021)   | DA (2021)   |
|------------|-------------|-------------|-------------|
| FR         | 0.79 ± 0.67 | 0.25 ± 0.12 | 2.11 ± 1.42 |
| Pyr        | 0.70 ± 0.54 | 0.22 ± 0.13 | 2.37 ± 1.66 |
| BaA        | 48.4 ± 50.2 | 11.5 ± 9.39 | 164 ± 120   |
| Chr        | 128 ± 9.99  | 2.61 ± 1.58 | 28.9 ± 18.5 |
| BbF        | 174 ± 136   | 43.2 ± 31.4 | 200 ± 99.9  |
| BkF        | 78.9 ± 68.3 | 15.7 ± 11.8 | 106 ± 54.8  |
| BaP        | 1149 ± 1145 | 247 ± 209   | 2301 ± 1358 |
| BeP        | 2.47 ± 1.84 | 0.60 ± 0.44 | 5.27 ± 3.20 |
| BgPe       | 21.8 ± 17.1 | 6.16 ± 4.32 | 30.6 ± 14.0 |
| IDP        | 178 ± 148   | 35.4 ± 25.7 | 198 ± 96.9  |
| Total PAHs | 1667 ± 1569 | 363 ± 294   | 3040 ± 1753 |

|             |             |                   |             |
|-------------|-------------|-------------------|-------------|
| 2-NFR       | 2.78 ± 2.79 | 0.32 ± 0.28       | 1.57 ± 0.76 |
| 1-NP        | 1.02 ± 1.09 | N.A. <sup>a</sup> | 2.45 ± 1.99 |
| 6-NC        | 59.3 ± 45.6 | N.A.              | 833 ± 883   |
| Total NPAHs | 63.1 ± 46.2 | 11.3 ± 31         | 837 ± 886   |
| Total TEQ   | 1730 ± 1577 | 363 ± 319         | 3877 ± 2548 |
| Summer      | GL (2020)   | XT (2022)         | DA (2022)   |
| FR          | 0.08 ± 0.04 | 0.11 ± 0.03       | 0.69 ± 0.17 |
| Pyr         | 0.09 ± 0.04 | 0.13 ± 0.04       | 0.12 ± 0.03 |
| BaA         | 6.98 ± 5.97 | 7.18 ± 2.83       | 15.3 ± 3.64 |
| Chr         | 1.70 ± 1.27 | 1.80 ± 0.74       | 1.22 ± 0.30 |
| BbF         | 22.8 ± 17.6 | 31.1 ± 13.5       | 23.7 ± 6.39 |
| BkF         | 11.7 ± 8.08 | 12.2 ± 5.67       | 51.6 ± 12.2 |
| BaP         | 183 ± 145   | 181 ± 82.1        | 233 ± 50.1  |
| BeP         | 0.49 ± 0.31 | 0.50 ± 0.23       | 0.78 ± 0.18 |
| BgPe        | 6.36 ± 3.43 | 7.46 ± 3.12       | 5.44 ± 1.12 |
| IDP         | 38.0 ± 22.0 | 45.3 ± 18.4       | 124 ± 25.3  |
| Total PAHs  | 271 ± 196   | 287 ± 124         | 456 ± 115   |
| 2-NFR       | 0.28 ± 0.16 | 0.57 ± 0.30       | 0.57 ± 0.17 |
| 1-NP        | 0.18 ± 0.21 | 0.55 ± 0.50       | 0.17 ± 0.17 |
| 6-NC        | 26.4 ± 26.6 | 29.8 ± 46.5       | 115 ± 32.8  |
| Total NPAHs | 26.9 ± 26.8 | 47.8 ± 34.2       | 115 ± 31.9  |
| Total TEQ   | 298 ± 218   | 318 ± 152         | 571 ± 111   |

<sup>a</sup> N.A.: Not Available

## References

1. U.S. EPA. 2010 U.S. Environmental Protection Agency (EPA) Decontamination Research and Development Conference; EPA/600/R-11/052; U.S. Environmental Protection Agency: Washington, DC, USA, 2011.
2. Collins, J.F.; Brown, J.P.; Alexeeff, G.V.; Salmon, A.G. Potency equivalency factors for some polycyclic aromatic hydrocarbons and polycyclic aromatic hydrocarbon derivatives. *Regul. Toxicol. Pharmacol.* **1998**, *28*, 45–54. <https://doi.org/10.1006/rtph.1998.1235>.
3. NCD Risk Factor Collaboration. Height and body-mass index trajectories of school-aged children and adolescents from 1985 to 2019 in 200 countries and territories: A pooled analysis of 2181 population-based studies with 65 million participants. In Yearbook of Paediatric Endocrinology; Bioscientifica Ltd.: Bristol, UK, 2021. <https://doi.org/10.1530/ey.18.13.15>.
4. Panis, L.I.; De Geus, B.; Vandenbulcke, G.; Willems, H.; Degraeuwe, B.; Bleux, N.; Mishra, V.; Thomas, I.; Meeusen, R. Exposure to particulate matter in traffic: A comparison of cyclists and car passengers. *Atmos. Environ.* **2010**, *44*, 2263–2270. <https://doi.org/10.1016/j.atmosenv.2010.04.028>.
5. Zhang, Z.H.; Khlystov, A.; Norford, L.K.; Tan, Z.K.; Balasubramanian, R. Characterization of traffic-related ambient fine particulate matter (PM 2.5) in an Asian city: Environmental and health implications. *Atmos. Environ.* **2017**, *161*, 132–143. <https://doi.org/10.1016/j.atmosenv.2017.04.040>.
6. The World Bank, Life Expectancy at Birth, Total (Years)—Vietnam. Available online: <https://data.worldbank.org/indicator/SP.DYN.LE00.IN?locations=VN> (accessed on 9 April 2023).
7. USDOE. The Risk Assessment Information System (RAIS). U.S. Department of Energy's Oak Ridge Operations Office (ORO). 2011. Available online: <http://rais.ornl.gov/> (accessed on 9 April 2023).
